# Supplementary material for: Microfluidic chips provide visual access to in situ soil ecology
Source: PubMed Central journal article supplement (PMC8292388; doi:10.1038/s42003-021-02379-5), 2021-07-20
Supplement: 42003_2021_2379_MOESM2_ESM.pdf [file 42003_2021_2379_MOESM2_ESM.pdf]

## Supplementary Information

### Microfluidic chips provide visual access to *in situ* soil ecology

Paola Micaela Mafla-Endara<sup>1,2</sup>, Carlos Arellano-Caicedo<sup>1</sup>, Kristin Aleklett<sup>1,3</sup>, Milda Pucetaite<sup>1</sup>, Pelle Ohlsson<sup>4</sup>, and Edith C. Hammer<sup>1,2\*</sup>

<sup>1</sup>*Department of Biology, Lund University, Lund, SWEDEN*

<sup>2</sup>*Centre for Environmental and Climate Science, CEC, Lund University, Lund, SWEDEN*

<sup>3</sup>*Department of Plant Protection Biology, Swedish University of Agricultural Sciences, Alnarp, SWEDEN*

<sup>4</sup>*Department of Biomedical Engineering, Lund University, Lund, SWEDEN*

*\*corresponding author: Edith Hammer, Microbial Ecology, Department of Biology, Lund University, Ecology Building, Sölvegatan 37, 223 62 Lund, Sweden, +46 (0)732 44 1968,*

[edith.hammer@biol.lu.se](mailto:edith.hammer@biol.lu.se)

## Supplementary Figures

**a**

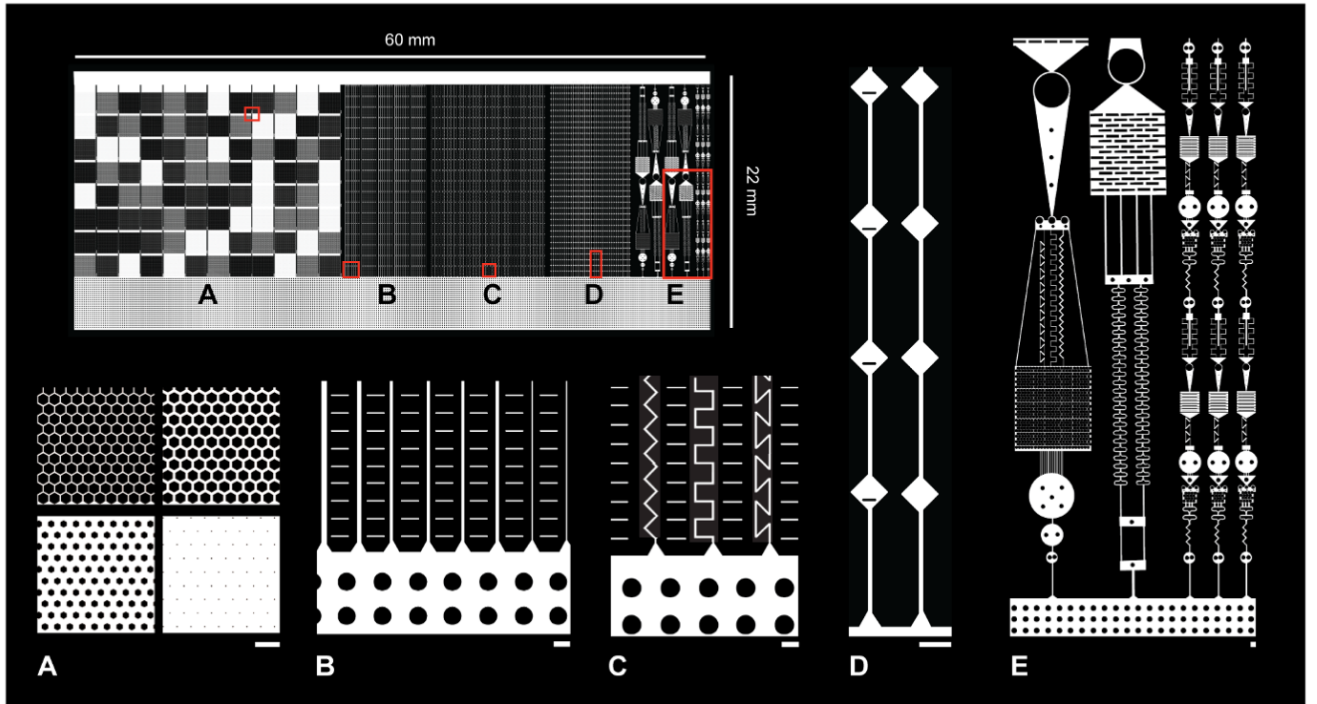

**b**

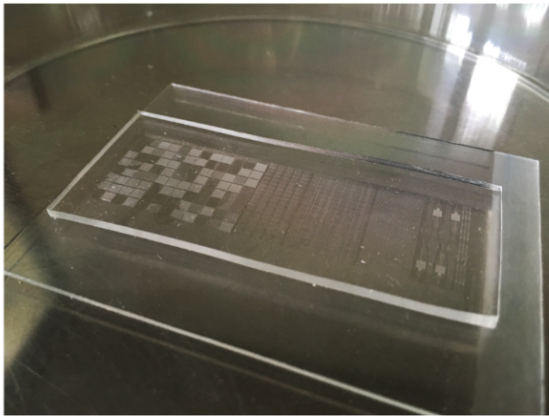

**c**

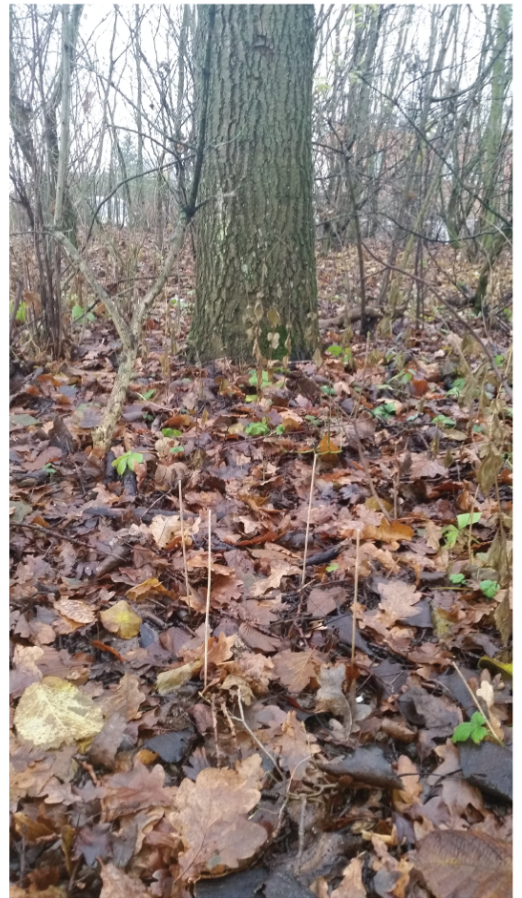

**d**

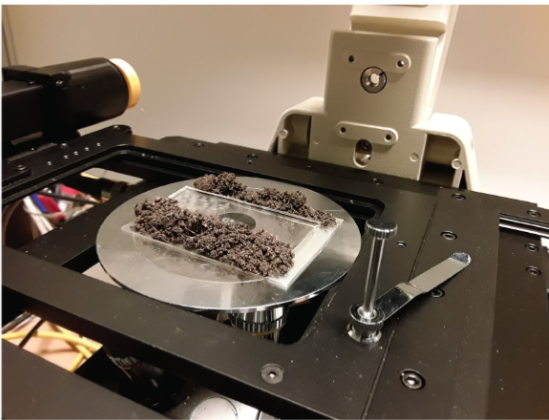

**Supplementary Figure 1. The soil chip and its use in soil.** **a** Overview over the design of the chip's internal structures, which contains five particular experimental sections, A-E as depicted in the top, and with detailed, zoomed-in illustrations for each section below and to the right. The red squares indicate the position of the high-magnification illustrations in the chip overview for each respective experimental section. Section A represents blocks of hexagonal pillars with different diameters thus creating different porosities (n=24). Section B consists of straight channels of different widths (20, 15, 10, 8, 6, 4  $\mu\text{m}$ ) with five replicates of each type. Section C corresponds to a set of 10  $\mu\text{m}$  wide angled channels with three different types of turning angle/arrangement (zigzag, square and z-shaped, n=12). The segments in between the angles in zigzag and square design are 100  $\mu\text{m}$ ; the long segments of the z-shaped channels are 200  $\mu\text{m}$  long. The total length of the zigzag channels is 27000  $\mu\text{m}$ , the other channel types were analyzed to the same length only. Section D consist of repeated patterns of 10  $\mu\text{m}$  width straight channels interspersed by widenings of a diameter of 140  $\mu\text{m}$ . Section E includes two different obstacle courses containing complex structures in irregular arrangement. Scale bars = 100  $\mu\text{m}$  (Section A, B, C, D, E). **b** Photograph of a newly produced chip. **c** Site where a chip was buried into the soil at 10 cm depth and remained for two months. **d** Microscopy analysis of the chip with adjacent soil after unearthing.

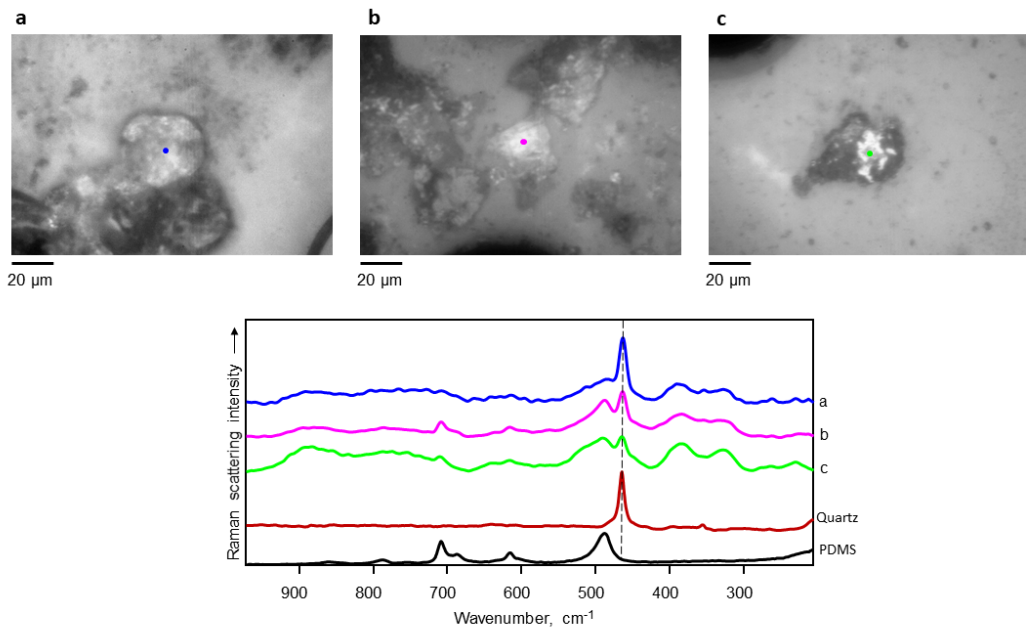

**Supplementary Figure 2. Raman scattering microscopic analysis of mineral particles inside the chip.** Examples of measured minerals (a-c), and their corresponding spectra over the reference spectra for quartz and PDMS.

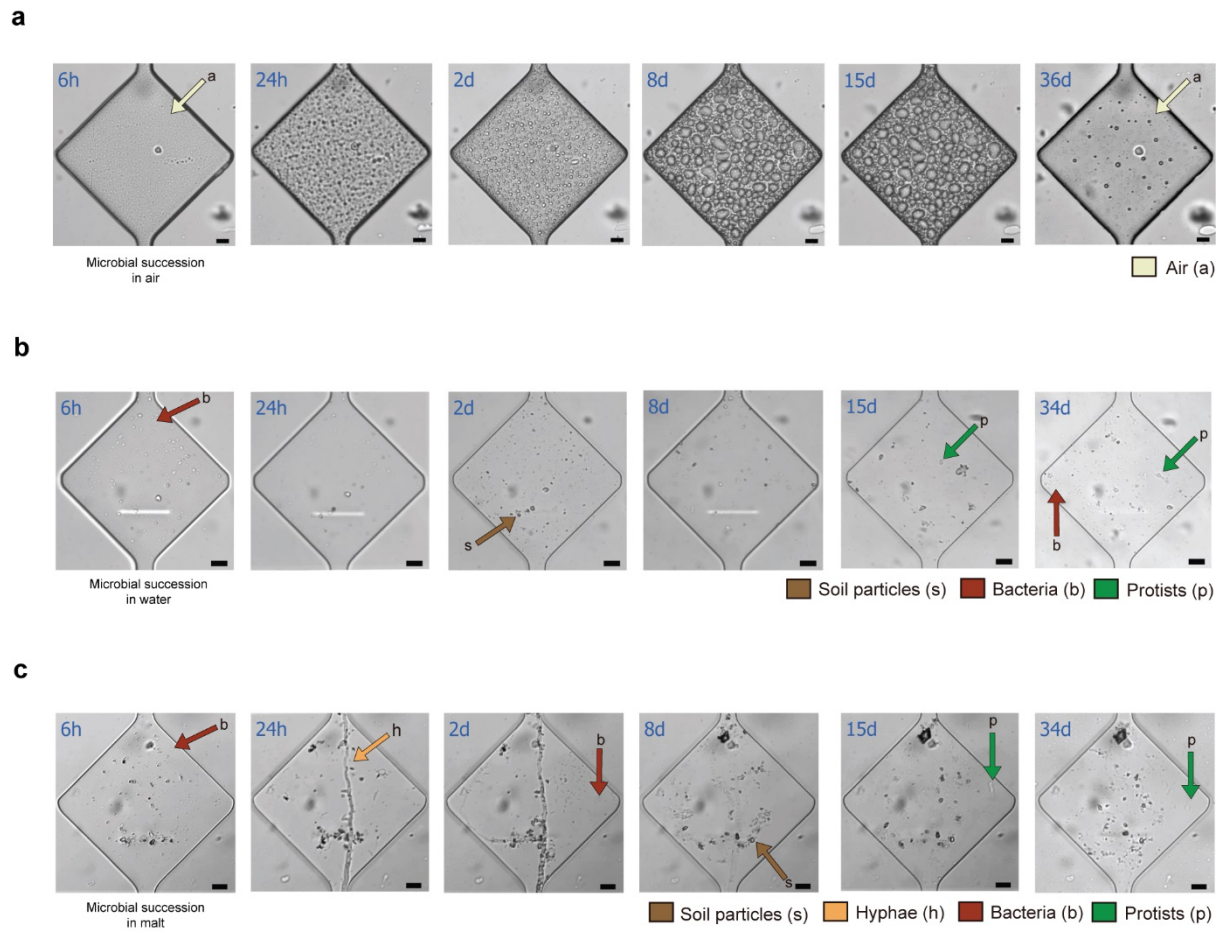

**Supplementary Figure 3. Microbial succession in the soil chips incubated with soil in the laboratory (Expt. 2).** Image sequences of the time-resolved changes in microbial colonization of a diamond-shaped widening along the channels used to calculate the presence of major soil microbial groups and water films in chips filled with air (**a**), water (**b**) and malt (**c**) (GIFs 1-3, resp.). Scale bar = 10  $\mu\text{m}$ .



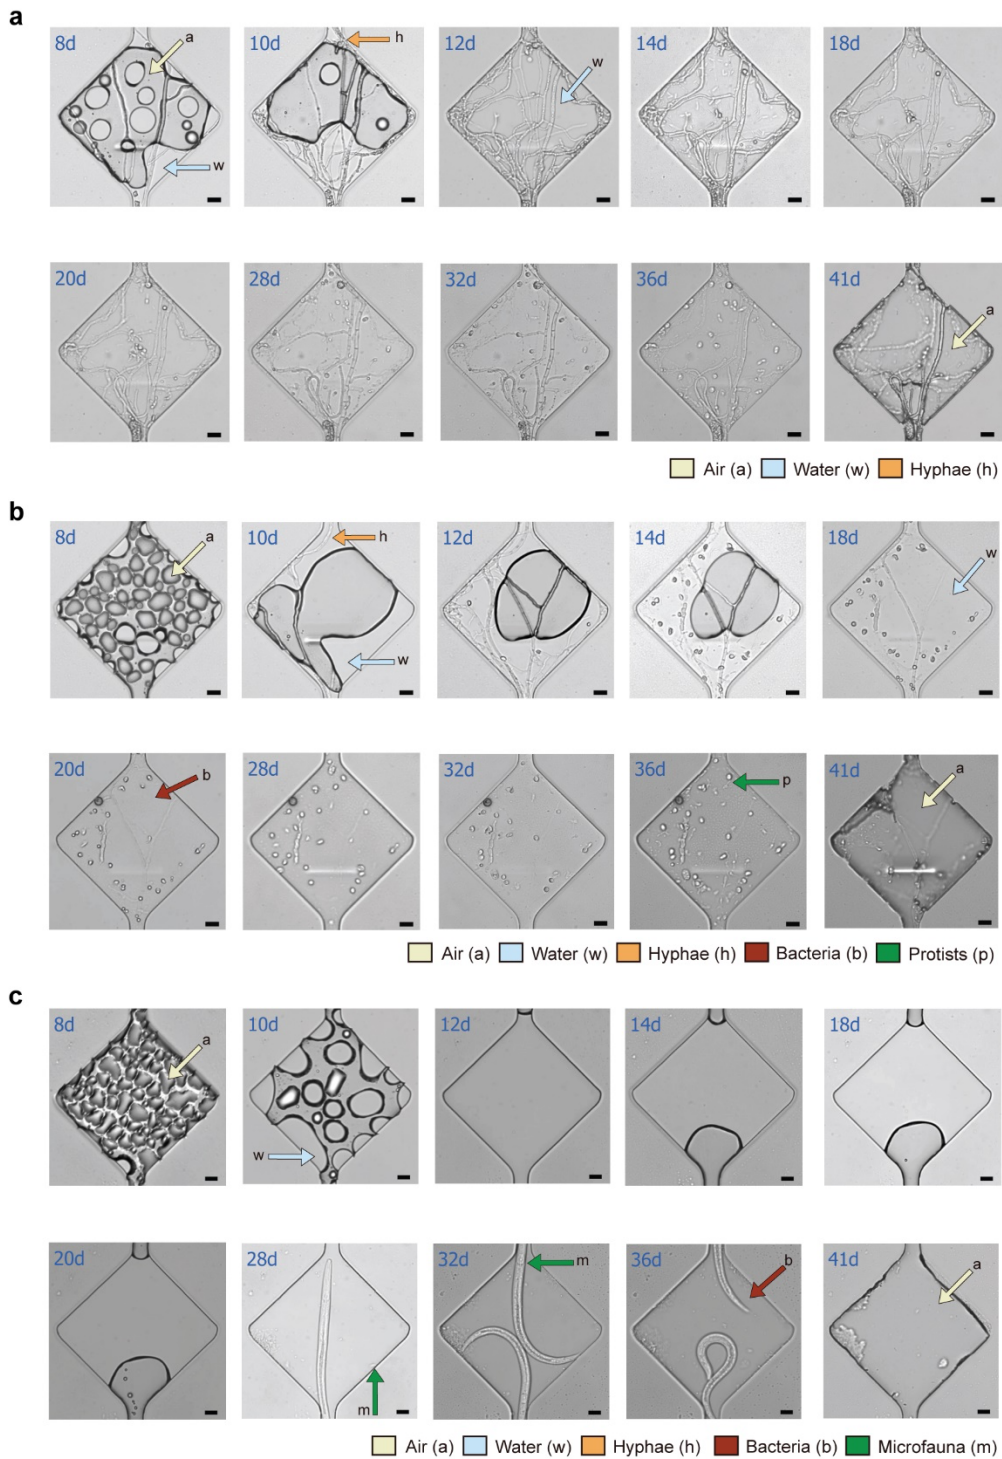

**Supplementary Figure 4. Microbial succession in air-filled soil chips incubated with soil in the laboratory (Expt. 3).** Image sequences of the time-resolved changes in microbial colonization of a diamond-shaped widening along the channels used to calculate the presence and abundance of major soil microbial groups and water films (**a**, **b**, **c**, corresponding to GIFs 4-6). Scale bar = 10  $\mu\text{m}$ .

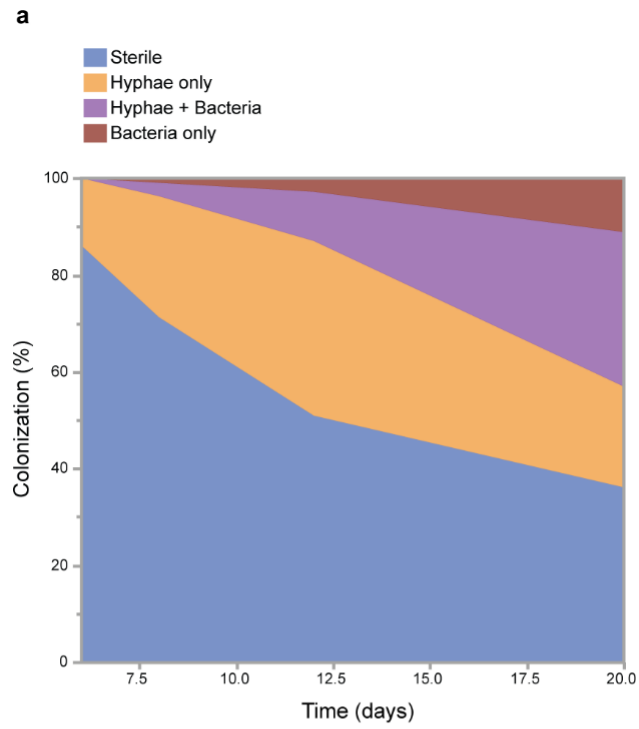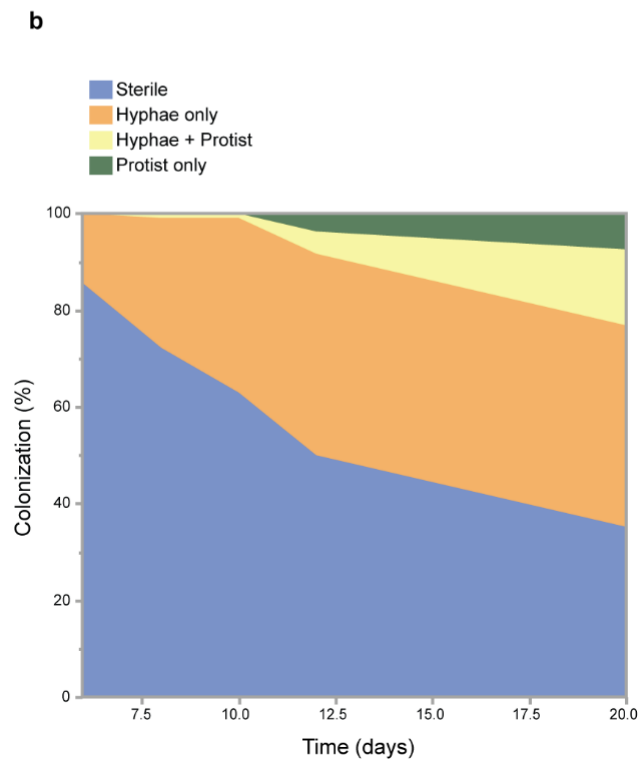

**Supplementary Figure 5. Frequency of co-dispersal of bacteria and protists with fungal hyphae.** Percentage of the 108 examined channels of three initially air-filled chips without any microorganism (sterile), with hyphae only, with bacteria or both (a), and with protists or both (b).
